1  
2  
3  
4  
5  
6  
7  
8  
9  
10  
11  
12  
13  
14  
15

**ORIGINAL RESEARCH ARTICLE**

**Title: Predator prey and the third beneficiary**

Anagha Pund<sup>1</sup>, Ketki Holkar<sup>1</sup>, Milind Watve<sup>1, 2</sup>, Ulfat Baig<sup>1\*</sup>

anagha.pund@students.iiserpune.ac.in, holkarketki29@gmail.com,  
milind.watve@gmail.com, ulfat@iiserpune.ac.in

\*For correspondence: ulfat@iiserpune.ac.in

<sup>1</sup> Indian Institute of Science Education and Research Pune

Dr. Homi Bhabha Road Pune 411008

<sup>2</sup> Deenanath Mangeshkar Hospital and Research Center,

Erandwane, Pune 411004

16 **Abstract:**

17 All bacterial epibiotic predators are rich in secondary metabolites and most genera rich in  
18 secondary metabolites have demonstrable predatory abilities. Therefore it is likely that an  
19 antibiotic resistant and thereby predation resistant species may benefit not only by escaping  
20 predation but also by utilizing nutrients released by lysis of prey cells by predatory bacteria.  
21 The resistant organisms may enjoy greater fitness benefits than the predator since they get  
22 the benefit without investing in the predation machinery. In our experiment, a marine  
23 isolate of *Streptomyces atrovirens* showed good predatory activity on a range of species  
24 including *Staphylococcus aureus* and *Proteus vulgaris*. *Escherichia coli* was resistant to  
25 predation by this species. On slide culture with water agar when the predator, *S. aureus* and  
26 *E. coli* were grown together *S. aureus* population declined whereas the predation resistant  
27 *E. coli* increased their population as compared to controls. However the growth of *E. coli* did  
28 not affect growth of the predator unfavorably. This strengthens the possibility that  
29 evolution of antibiotic resistance not only gave a selective advantage of escaping predation,  
30 it also would have increased the fitness of the resistant organism by promoting growth on  
31 nutrients released from the prey cells lysed by the predator. When the predator was grown  
32 with *S. aureus* and *P. vulgaris* as prey, *S. aureus* declined rapidly whereas *P. vulgaris* was  
33 spared. This suggests that the predator appears to show preference towards prey and in  
34 that case even a partial or relative resistance may give substantial advantage to a  
35 population.

36 Keywords: Predation, *Streptomyces atrovirens*, antibiotic-resistance.

37

38 **Introduction:**

39

40 Predation is defined as the act of consumption of a living organism by another living  
41 organism. Predation is a major ecological force, shaping the structure of communities,  
42 driving diversity and evolution of life histories (Stanley 1973; Day, Abrams and Chase 2002).  
43 Since bacteria do not have phagocytic abilities predatory bacteria lyse and degrade the prey  
44 cells using extracellular weapons including enzymes and secondary metabolites (Senges *et*  
45 *al.* 2018). Involvement of antibiotics and other secondary metabolites in predation is  
46 inferred from the strong association between predatory activity and genomic richness of  
47 secondary metabolites (Kumbhar and Watve 2013); differential expression of secondary  
48 metabolite genes when co-cultured with different prey species (Kumbhar *et al.* 2014) and  
49 loss of predatory abilities after mutating the antibiotic genes (Xiao *et al.* 2011). Kumbhar  
50 and Watve (2013) argued that antibiotics primarily evolved for predation, later diverging  
51 into mutualistic, signalling (Davies and Davies 2010) and other functions. Based on the  
52 association between antibiotics and predation Leisner *et al.* (2016) argued that antibiotic  
53 resistance primarily evolved to resist predation but further this ability allows the resistant  
54 organisms to cross feed on the nutrients released from the lysis of susceptible prey cells by  
55 the predator. Resistant organisms can thus hitch hike on the predator and they might enjoy  
56 a fitness advantage over the predator since the predator needs to invest in the predation  
57 machinery which the hitch hiker doesn't have to. Although this is a logical possibility, this  
58 has not been experimentally demonstrated so far.

59

60 *Streptomyces sp.* is known for producing an array of secondary metabolites (Watve  
61 *et al.* 2001). *Streptomyces spp.* are non-obligatory predators which are suspected to utilize a  
62 diversity of small molecules for predation (Kumbhar and Watve 2013; Kumbhar *et al.* 2014).  
63 The lysis of prey cells adjoining *Streptomyces* mycelium has been demonstrated  
64 microscopically using Differential Interference Contrast (DIC) microscopy (Kumbhar *et al.*  
65 2014). In the present study we monitored the populations of susceptible and resistant prey  
66 species in presence of a predatory *Streptomyces*. We screened *S. atrovirens*, a predatory  
67 marine isolate against 14 lab strains and environmental isolates out of which 6 were  
68 susceptible to predation (*S.aureus*, *P.vulgaris*, *Mycobacterium smegmatis*, *Serratia*

69 *marcencesus*, *Micrococcus leuteus* and *Bacillus subtilis*). After studying predatory activity  
70 against individual cultures we studied the responses of mixed populations of prey cells. The  
71 population response of a predation susceptible and resistant species, as well as two  
72 susceptible species co-cultured in presence of predator is reported here.

73

74 **Material and method:**

75

76 *Escherichia coli* (NCIM 2184), *Staphylococcus aureus* (NCIM 2121) and *Proteus vulgaris*  
77 (NCIM 2172) were inoculated in nutrient broth and incubated for 24 h at 37<sup>0</sup>C. Prey cells  
78 were centrifuged (Eppendorf centrifuge 5810R) at 6000 rpm for 10 min to concentrate cells  
79 followed by washing with sterile distilled water to remove traces of nutrients. After washing  
80 cells were suspended in sterile distilled water making thick slurry of cells. Prey cell number  
81 was standardized based upon a relationship between optical density of the washed  
82 suspension and the cell density obtained using Neubauer chamber (Rohem India BS 748). To  
83 study three species interaction we used two different co-culture combinations namely *E.*  
84 *coli* and *S. aureus* in approximately 1:1 ratio and *P. vulgaris* and *S. aureus* as prey in the  
85 same ratio. In these combinations it was possible to identify the cells based on morphology  
86 alone. It was not possible to study the *E. coli* - *P. vulgaris* combination owing to the difficulty  
87 of differential identification microscopically. The prey population was spread over the  
88 surface of water agarose bed on a slide culture over which *S. atrovirens* the predator, was  
89 spot inoculated. The agarose bed was covered with sterile coverslips so that same slide  
90 could be observed every day. The slides were incubated at 30°C for up to five days in moist  
91 chambers. Three controls were prepared similarly with (i) individual prey species in pure  
92 culture (ii) individual prey species in presence of predator and (iii) co-culture of two prey  
93 species without the predator.

94 Observations were made daily using DIC microscopy on Zeiss Axioimager M-1 upright  
95 microscope (100X/1.40 Oil DIC M27), alpha plan apochromat objective, with a digital  
96 camera, HAL 100 illuminator and quartz collector controlled by Axio software 4.8. DIC  
97 images were taken and resulting images were used for the quantification of cells. Ten  
98 randomly selected fields were imaged from every slide every day. The number of cells of

99 each of the prey species per field was counted from the images. *S. atrovirens* being a  
100 mycelial species, we recorded in every image the number of times a diagonal crossed  
101 mycelial threads. The change in the population densities thus measured during the five day  
102 incubation period was studied.

### 103 **Reproducibility runs:**

104 Experiment was repeated three times at different time points (data not shown here) and  
105 similar trends were observed in all the repetitions. Since the starting populations were  
106 substantially different in every run we did not pool the results. In all the three experiments  
107 the results were qualitatively the same in that in every run, *S. aureus* population declined  
108 while *E. coli* population and the predator population increased in three species experiment.  
109 In case of three species experiment with two sensitive organisms *S. aureus* and *P. vulgaris*  
110 populations of both the organisms declined; *S. aureus* being first to show decline followed  
111 by decrease in *P. vulgaris* population. Predator, *S. atrovirens* increased in both the  
112 experiments.

### 113 **Results:**

114 Since the medium contained no nutrients, in pure culture controls the prey cells did not  
115 show a significant trend in population during the incubation period. In prey co-culture there  
116 was no significant trend in the populations of *S. aureus* and *E. coli* however *S. aureus* and *P.*  
117 *vulgaris* populations showed a growing trend when co-culturing indicating some synergistic  
118 interaction. We did not investigate the nature of this interaction. In one to one predator  
119 prey interactions *S. aureus* and *P. vulgaris* populations showed a monotonic declining trend  
120 while the predator population increased. In the *E. coli* predator interaction, neither the  
121 population of the predator nor that of *E. coli* showed a time trend.

122 In the three species interaction experiment with *S. aureus* and *E. coli* along with the  
123 predator, the *S. aureus* population declined by 97 % whereas the *E. coli* population  
124 increased by 60 % (Fig. 1C). The predator population increased by 72 % (Fig. 1D).

125

126  
127  
128  
129  
130  
131  
132  
133  
134  
135  
136  
137  
138  
139  
140  
141  
142  
143  
144  
145

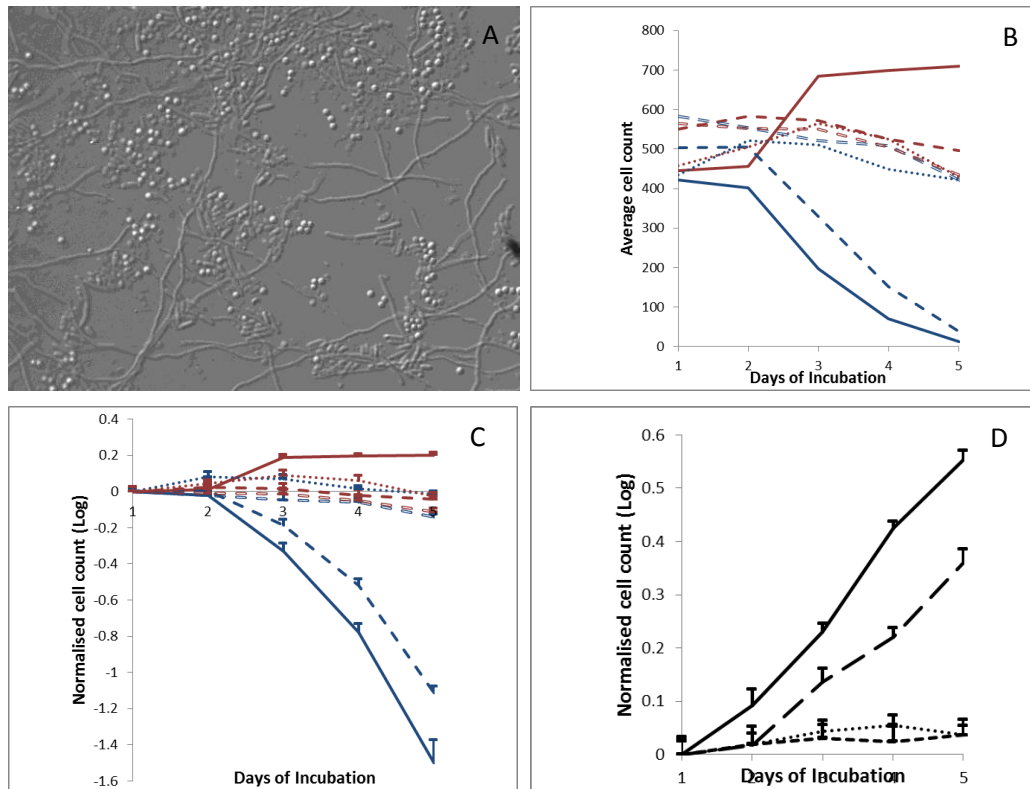

Figure 1: Change in cell density of prey predator and resistant cells in three species interaction.

146  
147  
148  
149  
150  
151  
152  
153  
154  
155  
156

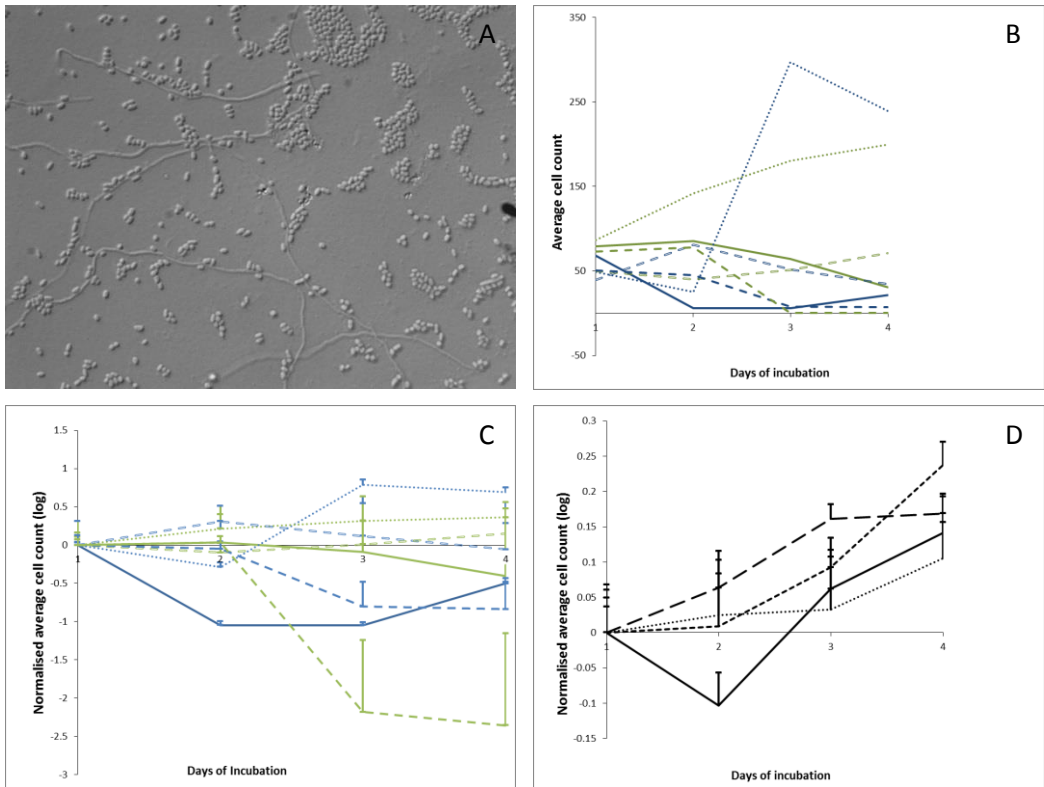

157  
158  
159  
160  
161  
162  
163  
164  
165  
166  
167  
168  
169

**Figure 2: Change in cell density of predator and two sensitive prey cells in three species interaction**

**A.** Microscopic image of slide culture for three species experiment with two sensitive cells. **B.** Change in absolute average cell count of *S.aureus* (Solid blue line) and *P. vulgaris* (Solid green line) along with controls (*S.aureus* predation in solid dashed blue line, *S.aureus* in coculture with *P. vulgaris* in dotted blue line, pure *S.aureus* in hollow dashed blue line and *P. vulgaris* predation in solid dashed green line, *P. vulgaris* in coculture with *S.aureus* in dotted green line, pure *P. vulgaris* in hollow dashed green line) over incubation period. **C.** Change in cell count of *S.aureus* and *P. vulgaris* (normalized and on log scale) **D.** Change in cell count of predator, *S.atrovirens* (Solid black line) along with controls (*S.atrovirens* count in *S.aureus* predation, long dashed black line, *S.atrovirens* count in *P. vulgaris* predation, small dashed black line, pure *S.atrovirens* dotted black line.)

In the three species interaction experiment with *S. aureus* and *P. vulgaris* along with the predator by the second day, the *S. aureus* population declined by about 68% and remained low on the third day but *P. vulgaris* population did not show a significant change. However, during the last phase of growth the *P. vulgaris* population showed a decline by about 61% whereas *S. aureus* showed a small but significant increase (Fig. 2C). *S. atrovirens* population increased monotonically (Fig. 2D). This suggests that the predator might have selectively preferred *S. aureus* in the first phase and when its population declined below a threshold shifted to *P. vulgaris* allowing some comeback growth of *S. aureus*.

170 **Discussion:**

171 The results highlight the complexity of multi-species interactions in bacteria. Earlier studies  
172 have shown that in the absence of other soluble nutrients, some bacterial genera turn  
173 predatory and grow at the expense of surrounding cells. We show here that different  
174 bacteria show differential sensitivity to predation which is important in shaping the patterns  
175 of interaction. Since bacterial predation is an extracellular phenomenon, a resistant  
176 organism gets an added nutritional benefit when in proximity of a predator and a  
177 susceptible organism. This was predicted earlier (Leisner, Jørgensen and Middelboe 2016)  
178 but our experiments have demonstrated this advantage of resistance empirically for the first  
179 time. The mechanism of predation resistance is not yet known. Secondary metabolites of  
180 the predator are suspected to have a role in predation (Kumbhar *et al.* 2014), therefore it is  
181 likely that resistance to the secondary metabolites might be the primary mechanism of  
182 predation resistance. If this is true it gives an added dimension to the evolution of antibiotic  
183 resistance.

184 More complex and more interesting appear to be the interaction between of two predation  
185 susceptible species. The predator that showed successful predation on both when tested  
186 separately appeared to exhibit preferential consumption of one species when challenged  
187 with both together. This appears to have spared the other species at least for some time.  
188 This demonstrates that even partial or relative resistance may give substantial selective  
189 advantages in natural multispecies settings.

190 Microbiology has largely progressed by pure culture studies. Natural ecosystems, on the  
191 other hand have a variety of multispecies interactions about which our understanding is still  
192 quite primitive. The experiments suggest that studying multispecies interactions will reveal a  
193 variety of novel dimensions of bacterial life in nature.

194

195

196

197



198 **References:**

199 Davies J, Davies D. Origins and Evolution of Antibiotic Resistance. *Microbiol Mol Biol Rev*  
200 2010, DOI: 10.1128/membr.00016-10.

201 Day T, Abrams PA, Chase JM. The role of size-specific predation in the evolution and  
202 diversification of prey life histories. *Evolution (N Y)* 2002, DOI: 10.1111/j.0014-  
203 3820.2002.tb01401.x.

204 Kumbhar C, Mudliar P, Bhatia L *et al.* Widespread predatory abilities in the genus  
205 *Streptomyces*. *Arch Microbiol* 2014, DOI: 10.1007/s00203-014-0961-7.

206 Kumbhar C, Watve M. Why antibiotics: A comparative evaluation of different hypotheses for  
207 the natural role of antibiotics and an evolutionary synthesis. 2013;**5**:26–40.

208 Leisner JJ, Jørgensen NOG, Middelboe M. Predation and selection for antibiotic resistance in  
209 natural environments. *Evol Appl* 2016, DOI: 10.1111/eva.12353.

210 Senges CHR, Al-Dilaimi A, Marchbank DH *et al.* The secreted metabolome of *Streptomyces*  
211 *chartreusis* and implications for bacterial chemistry . *Proc Natl Acad Sci*  
212 2018;**115**:2490–5.

213 Stanley SM. Ecological Theory for Sudden Origin of Multicellular Life in Late Precambrian -  
214 (Adaptive Radiation-Cambrian-Evolution-Paleontology-Predation). *Proc Natl Acad Sci U*  
215 *S A* 1973;**70**:1486–9.

216 Watve MG, Tickoo R, Jog MM *et al.* How many antibiotics are produced by the genus  
217 *Streptomyces*? *Arch Microbiol* 2001;**176**:386–90.

218 Xiao Y, Wei X, Ebricht R *et al.* Antibiotic production by myxobacteria plays a role in  
219 predation. *J Bacteriol* 2011, DOI: 10.1128/JB.05052-11.

220

221 **Funding:**

222 Funding for this research was provided by Rajiv Gandhi Science and Technology Commission  
223 under Maharashtra Gene Bank Programme.
